# Supplementary material for: Soil Layers Matter: Vertical Stratification of Root-Associated Fungal Assemblages in Temperate Forests Reveals Differences in Habitat Colonization
Source: MDPI journal article supplement (doi:10.3390/microorganisms9102131), 2021-10-11
Supplement: s1 [file s1]

# Soil layers matter: vertical stratification of root-associated fungal assemblages in temperate forests reveals differences in habitat colonization

Anis Mahmud Khokon <sup>1</sup>, Dominik Schneider <sup>2</sup>, Rolf Daniel <sup>2</sup> and Andrea Polle <sup>1,\*</sup>

<sup>1</sup> Forest Botany and Tree Physiology, University of Göttingen, 37077 Göttingen, Germany; anis.khokon@gwdg.de (A.M.K.)

<sup>2</sup> Genomic and Applied Microbiology and Göttingen Genomics Laboratory, Institute of Microbiology and Genetics, University of Göttingen, 37077 Göttingen, Germany; dschnei1@gwdg.de (D.S.); rdaniel@gwdg.de (R.D.)

\* Correspondence: apolle@gwdg.de (A.P.)

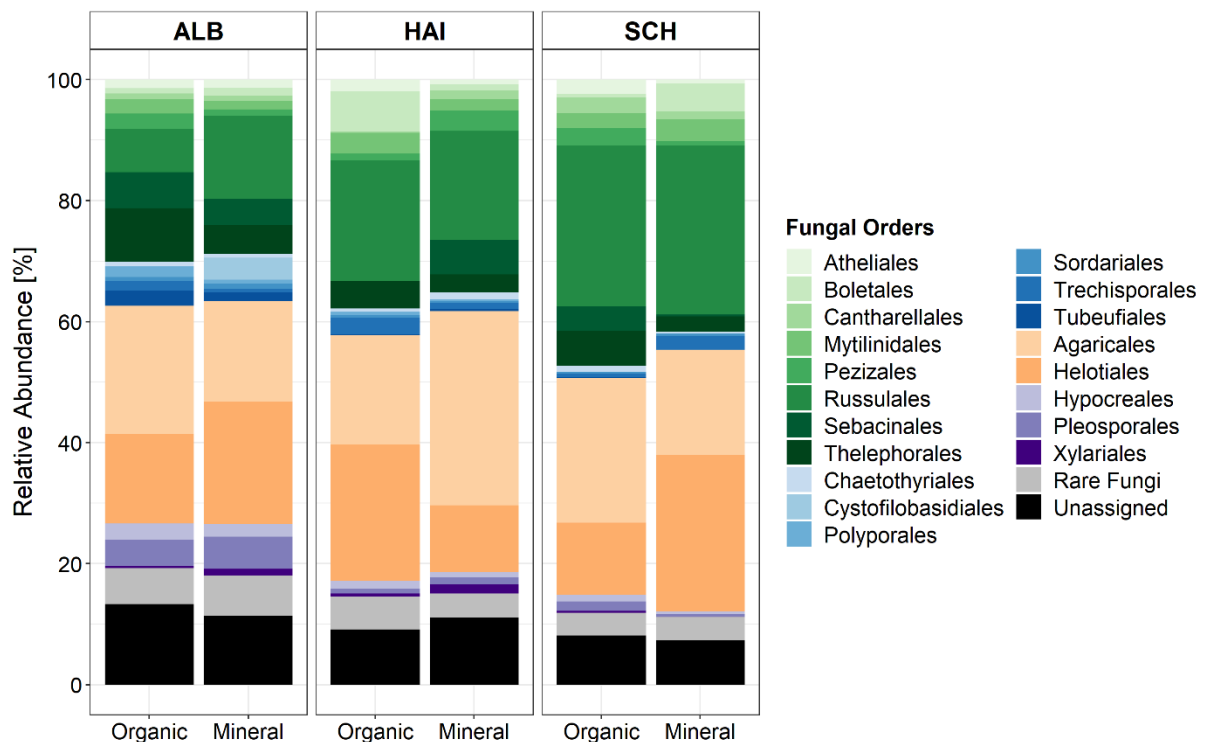

**Figure S1:** Relative abundance of root-associated fungi compiled at the order level in the organic layer and mineral soil and in different regions. ALB = Schwäbische Alb, HAI = Hainich-Dün and SCH = Schorfheide-Chorin. “Rare Fungi” (grey color): fungal orders with < 0.5% of the total number of sequences were summarized. Unassigned (black color): fungi that were not identified at the level of the fungal order were summarized. Fungal orders: green colours refer to symbiotrophic (SYM), blue to saprotrophic (SAP), orange to mixed SYM + SAP and purple to SAP + PAT fungal guilds.

**Table S1:** Location of the study plots in the Biodiversity Exploratories. Schwäbische Alb = ALB, Hainich-Dün = HAI and Schorfheide-Chorin = SCH, NA = not available. Total dry fine root biomass (g kg<sup>-1</sup> soil) in organic layer and in mineral topsoil. Data were taken from BExIS datasets ID (1000, 31048 and 31049).

| Plot ID | Regions | Latitude | Longitude | fine root biomass in<br>organic layers | fine root biomass in<br>mineral topsoil |
|---------|---------|----------|-----------|----------------------------------------|-----------------------------------------|
| ALB1    | ALB     | 48.48    | 9.33      | 3.92                                   | 1.87                                    |
| ALB2    | ALB     | 48.38    | 9.35      | 2.88                                   | 1.56                                    |
| ALB3    | ALB     | 48.41    | 9.36      | 10.54                                  | 2.00                                    |
| ALB4    | ALB     | 48.4     | 9.24      | 1.22                                   | 2.89                                    |
| ALB5    | ALB     | 48.42    | 9.41      | 0.64                                   | 2.29                                    |
| ALB6    | ALB     | 48.39    | 9.45      | 2.84                                   | 2.09                                    |
| ALB7    | ALB     | 48.4     | 9.26      | 6.08                                   | 2.54                                    |
| ALB8    | ALB     | 48.38    | 9.38      | 3.08                                   | 2.72                                    |
| ALB9    | ALB     | 48.37    | 9.42      | 5.42                                   | 3.45                                    |
| ALB10   | ALB     | 48.38    | 9.39      | 4.05                                   | 1.58                                    |
| ALB11   | ALB     | 48.49    | 9.32      | 5.84                                   | 2.79                                    |
| ALB12   | ALB     | 48.37    | 9.25      | 6.59                                   | 1.62                                    |
| ALB13   | ALB     | 48.38    | 9.4       | 1.66                                   | 2.60                                    |
| ALB14   | ALB     | 48.38    | 9.34      | 1.26                                   | 1.65                                    |
| ALB15   | ALB     | 48.39    | 9.41      | 0.75                                   | 1.70                                    |
| ALB16   | ALB     | 48.39    | 9.44      | 9.48                                   | 3.65                                    |
| ALB17   | ALB     | 48.4     | 9.24      | 1.11                                   | 1.77                                    |
| ALB18   | ALB     | 48.37    | 9.23      | 1.25                                   | 2.35                                    |
| ALB19   | ALB     | 48.48    | 9.31      | 2.25                                   | 3.69                                    |
| ALB20   | ALB     | 48.37    | 9.32      | 0.30                                   | 2.01                                    |
| ALB21   | ALB     | 48.48    | 9.32      | 3.11                                   | 3.71                                    |
| ALB22   | ALB     | 48.38    | 9.45      | 0.98                                   | 3.11                                    |
| ALB23   | ALB     | 48.39    | 9.49      | 2.64                                   | 3.30                                    |
| ALB24   | ALB     | 48.48    | 9.29      | 2.55                                   | 4.44                                    |
| ALB25   | ALB     | 48.48    | 9.42      | 0.14                                   | 3.17                                    |
| ALB26   | ALB     | 48.42    | 9.44      | 1.02                                   | 1.88                                    |
| ALB27   | ALB     | 48.4     | 9.47      | 0.88                                   | 1.53                                    |
| ALB28   | ALB     | 48.49    | 9.31      | 3.93                                   | 2.05                                    |
| ALB29   | ALB     | 48.38    | 9.36      | 2.74                                   | 2.39                                    |
| ALB30   | ALB     | 48.37    | 9.37      | 0.49                                   | 4.02                                    |
| ALB31   | ALB     | 48.38    | 9.26      | 1.76                                   | 1.57                                    |
| ALB32   | ALB     | 48.41    | 9.37      | 2.88                                   | 6.85                                    |
| ALB33   | ALB     | 48.39    | 9.49      | 7.64                                   | 4.43                                    |
| ALB34   | ALB     | 48.39    | 9.5       | 6.40                                   | 2.39                                    |
| ALB35   | ALB     | 48.45    | 9.42      | 0.78                                   | 2.82                                    |
| ALB36   | ALB     | 48.38    | 9.22      | 1.17                                   | 4.00                                    |
| ALB37   | ALB     | 48.39    | 9.44      | 0.67                                   | 4.21                                    |
| ALB38   | ALB     | 48.38    | 9.45      | 2.06                                   | 2.25                                    |
| ALB39   | ALB     | 48.38    | 9.24      | 1.11                                   | 3.49                                    |
| ALB40   | ALB     | 48.5     | 9.35      | 0.52                                   | 3.96                                    |
| ALB41   | ALB     | 48.36    | 9.4       | 0.50                                   | 2.47                                    |
| ALB42   | ALB     | 48.4     | 9.45      | 1.15                                   | NA                                      |

|       |     |       |       |      |      |
|-------|-----|-------|-------|------|------|
| ALB43 | ALB | 48.38 | 9.38  | 1.91 | 1.07 |
| ALB44 | ALB | 48.39 | 9.22  | 0.84 | 3.99 |
| ALB45 | ALB | 48.39 | 9.5   | 3.04 | 1.92 |
| ALB46 | ALB | 48.39 | 9.36  | 1.05 | 1.68 |
| ALB47 | ALB | 48.42 | 9.41  | 3.84 | 2.82 |
| ALB48 | ALB | 48.39 | 9.47  | 0.67 | 1.90 |
| ALB49 | ALB | 48.45 | 9.48  | 0.34 | 3.57 |
| ALB50 | ALB | 48.39 | 9.25  | 1.29 | 4.06 |
| HAI1  | HAI | 51.19 | 10.32 | 5.35 | 1.30 |
| HAI3  | HAI | 51.27 | 10.31 | 6.49 | 1.40 |
| HAI4  | HAI | 51.37 | 10.53 | 3.72 | 4.17 |
| HAI5  | HAI | 51.26 | 10.24 | 3.27 | 1.42 |
| HAI6  | HAI | 51.27 | 10.24 | 3.98 | 1.95 |
| HAI7  | HAI | 51.13 | 10.39 | 4.37 | 1.80 |
| HAI8  | HAI | 51.36 | 10.52 | 1.74 | 1.86 |
| HAI9  | HAI | 51.13 | 10.38 | 2.76 | 0.76 |
| HAI10 | HAI | 51.09 | 10.46 | 0.93 | 1.01 |
| HAI11 | HAI | 51.1  | 10.4  | 1.43 | 1.90 |
| HAI12 | HAI | 51.1  | 10.46 | 1.77 | 1.11 |
| HAI13 | HAI | 51.24 | 10.31 | 1.71 | 1.15 |
| HAI14 | HAI | 51.37 | 10.26 | 4.31 | 3.56 |
| HAI15 | HAI | 51.21 | 10.39 | 2.99 | 2.63 |
| HAI16 | HAI | 51.18 | 10.37 | 8.12 | 3.53 |
| HAI17 | HAI | 51.28 | 10.23 | 2.51 | 2.18 |
| HAI18 | HAI | 51.34 | 10.37 | 8.47 | 6.19 |
| HAI19 | HAI | 51.2  | 10.34 | 2.41 | 1.04 |
| HAI20 | HAI | 51.33 | 10.36 | 3.09 | 2.13 |
| HAI21 | HAI | 51.19 | 10.32 | 3.50 | 1.67 |
| HAI22 | HAI | 51.34 | 10.36 | 9.02 | 1.74 |
| HAI23 | HAI | 51.28 | 10.21 | 3.28 | 3.17 |
| HAI24 | HAI | 51.05 | 10.49 | 1.79 | 1.31 |
| HAI25 | HAI | 51.28 | 10.22 | 2.86 | 2.67 |
| HAI26 | HAI | 51.34 | 10.51 | 2.97 | 1.78 |
| HAI27 | HAI | 51.36 | 10.52 | 2.85 | 1.45 |
| HAI28 | HAI | 51.36 | 10.53 | 1.13 | 0.82 |
| HAI29 | HAI | 51.13 | 10.38 | 2.44 | 1.05 |
| HAI30 | HAI | 51.13 | 10.38 | 3.02 | 0.97 |
| HAI31 | HAI | 51.14 | 10.38 | 3.28 | 1.40 |
| HAI32 | HAI | 51.14 | 10.36 | 3.18 | 1.36 |
| HAI33 | HAI | 51.34 | 10.51 | 1.89 | 1.44 |
| HAI34 | HAI | 51.08 | 10.45 | 0.73 | 1.61 |
| HAI35 | HAI | 51.1  | 10.41 | 2.05 | 1.96 |
| HAI36 | HAI | 51.11 | 10.41 | 1.34 | 2.60 |
| HAI37 | HAI | 51.08 | 10.46 | 0.49 | 1.29 |
| HAI38 | HAI | 51.08 | 10.46 | 2.25 | 1.67 |
| HAI39 | HAI | 51.09 | 10.47 | 0.42 | 1.05 |
| HAI40 | HAI | 51.08 | 10.5  | 0.56 | 1.93 |

|       |     |       |       |       |      |
|-------|-----|-------|-------|-------|------|
| HAI41 | HAI | 51.11 | 10.45 | 1.32  | 1.75 |
| HAI42 | HAI | 51.1  | 10.46 | 0.76  | 1.00 |
| HAI43 | HAI | 51.33 | 10.36 | 1.32  | 4.27 |
| HAI44 | HAI | 51.33 | 10.37 | 9.26  | 4.81 |
| HAI45 | HAI | 51.36 | 10.26 | 10.47 | 1.87 |
| HAI46 | HAI | 51.05 | 10.48 | 0.91  | 1.55 |
| HAI47 | HAI | 51.18 | 10.38 | 6.40  | 1.74 |
| HAI48 | HAI | 51.14 | 10.39 | 1.89  | 1.43 |
| HAI49 | HAI | 51.14 | 10.38 | 4.58  | 1.15 |
| HAI50 | HAI | 51.09 | 10.46 | 0.60  | 1.76 |
| HAI51 | HAI | 51.21 | 10.37 | 2.56  | 4.81 |
| SCH1  | SCH | 52.9  | 13.85 | 11.15 | 0.49 |
| SCH2  | SCH | 52.95 | 13.78 | 14.35 | 0.82 |
| SCH3  | SCH | 52.92 | 13.64 | 24.73 | 0.35 |
| SCH4  | SCH | 52.92 | 13.85 | 9.53  | 0.83 |
| SCH5  | SCH | 53.06 | 13.89 | 17.17 | NA   |
| SCH6  | SCH | 52.91 | 13.84 | 14.09 | 1.55 |
| SCH7  | SCH | 53.11 | 13.69 | 4.46  | 1.13 |
| SCH8  | SCH | 53.19 | 13.93 | 1.91  | 1.30 |
| SCH9  | SCH | 53.04 | 13.81 | 36.54 | 1.14 |
| SCH10 | SCH | 53.09 | 13.64 | 4.70  | 0.49 |
| SCH11 | SCH | 53.09 | 13.63 | 6.46  | 0.49 |
| SCH12 | SCH | 53.09 | 13.7  | 11.46 | 0.69 |
| SCH13 | SCH | 53.02 | 13.86 | 8.81  | 0.74 |
| SCH14 | SCH | 52.92 | 13.75 | 5.58  | 0.29 |
| SCH15 | SCH | 52.91 | 13.74 | 5.99  | 0.23 |
| SCH16 | SCH | 53.08 | 13.86 | 21.54 | 0.68 |
| SCH17 | SCH | 52.94 | 13.83 | 27.13 | 0.46 |
| SCH18 | SCH | 52.86 | 13.92 | 19.92 | 0.68 |
| SCH19 | SCH | 53.09 | 13.64 | 7.72  | 0.41 |
| SCH20 | SCH | 53.09 | 13.64 | 13.44 | 1.09 |
| SCH21 | SCH | 52.92 | 13.74 | 18.12 | 0.62 |
| SCH22 | SCH | 53.06 | 13.91 | 2.76  | 0.54 |
| SCH23 | SCH | 52.95 | 13.78 | 6.41  | 0.76 |
| SCH24 | SCH | 52.89 | 13.97 | 5.28  | 0.82 |
| SCH25 | SCH | 52.92 | 13.76 | 4.37  | 0.90 |
| SCH26 | SCH | 52.92 | 13.75 | 4.04  | 0.54 |
| SCH27 | SCH | 52.89 | 14    | 2.35  | 0.87 |
| SCH28 | SCH | 52.88 | 13.66 | 3.66  | 0.38 |
| SCH29 | SCH | 53.02 | 13.86 | 9.36  | 0.85 |
| SCH30 | SCH | 53.06 | 13.92 | 3.82  | 0.71 |
| SCH31 | SCH | 52.88 | 13.9  | 15.92 | 1.25 |
| SCH32 | SCH | 53.06 | 13.93 | 4.00  | 1.61 |
| SCH33 | SCH | 52.92 | 13.89 | 18.51 | 1.12 |
| SCH34 | SCH | 52.9  | 13.85 | 20.01 | 0.58 |
| SCH35 | SCH | 52.91 | 13.85 | 13.93 | 0.88 |
| SCH36 | SCH | 52.95 | 13.75 | 10.84 | 1.53 |

|       |     |       |       |       |      |
|-------|-----|-------|-------|-------|------|
| SCH37 | SCH | 52.94 | 13.78 | 11.23 | 1.56 |
| SCH38 | SCH | 52.89 | 13.67 | 5.85  | 0.77 |
| SCH39 | SCH | 52.92 | 13.87 | 9.66  | 0.91 |
| SCH40 | SCH | 52.91 | 13.86 | 12.21 | 0.71 |
| SCH41 | SCH | 52.91 | 13.91 | 12.41 | 1.41 |
| SCH42 | SCH | 52.9  | 13.91 | 10.03 | 1.83 |
| SCH43 | SCH | 52.9  | 13.93 | 14.16 | 1.44 |
| SCH44 | SCH | 52.92 | 13.86 | 6.83  | 1.50 |
| SCH45 | SCH | 53.05 | 13.84 | 4.87  | 0.98 |
| SCH46 | SCH | 53.07 | 13.78 | 2.62  | 0.85 |
| SCH47 | SCH | 53.07 | 13.77 | 5.81  | 1.33 |
| SCH48 | SCH | 53.05 | 13.84 | 2.73  | 0.68 |
| SCH49 | SCH | 52.89 | 13.89 | 13.76 | 1.21 |
| SCH50 | SCH | 53.04 | 13.79 | 3.85  | 1.51 |

---

**Table S2:** Observed species richness (OTU-based), estimated richness (Chao1), Shannon diversity ( $H'$ ) and evenness ( $E_H$ ) of root-associated fungi in different soil layers across three biogeographic regions. Symbiotrophic = SYM, saprotrophic = SAP, pathotrophic = PAT, ALB = Schwäbische Alb, HAI = Hainich-Dün, SCH = Schorfheide-Chorin. Data indicate means  $\pm$  SE (n = 50). Linear models were used to compare the means of Chao1, Shannon and evenness between the regions. Generalized linear models were used to compare means of the observed species richness between the regions. Significant differences of the means are shown in bold. Different letters denote significant differences between soil layers and within the regions.

|                    | ALB                    |                       | HAI                     |                       | SCH                    |                       | <i>p</i> -value (regions) |                |
|--------------------|------------------------|-----------------------|-------------------------|-----------------------|------------------------|-----------------------|---------------------------|----------------|
|                    | Organic                | Mineral               | Organic                 | Mineral               | Organic                | Mineral               | Organic                   | Mineral        |
| <b>All Fungi</b>   |                        |                       |                         |                       |                        |                       |                           |                |
| OTU Richness       | 188.36 $\pm$ 8.70 (e)  | 146.26 $\pm$ 5.24 (b) | 164.22 $\pm$ 8.16 (d)   | 156.84 $\pm$ 5.92 (c) | 158.24 $\pm$ 4.61 (cd) | 106.08 $\pm$ 5.90 (a) | < <b>0.001</b>            | < <b>0.001</b> |
| Chao1              | 285.77 $\pm$ 13.07 (c) | 223.99 $\pm$ 7.94 (b) | 258.97 $\pm$ 12.29 (bc) | 237.56 $\pm$ 8.67 (b) | 243.76 $\pm$ 7.40 (b)  | 160.48 $\pm$ 9.17 (a) | <b>0.030</b>              | < <b>0.001</b> |
| Shannon ( $H'$ )   | 2.93 $\pm$ 0.11 (b)    | 2.83 $\pm$ 0.08 (ab)  | 2.79 $\pm$ 0.11 (ab)    | 2.95 $\pm$ 0.07 (b)   | 2.98 $\pm$ 0.07 (b)    | 2.56 $\pm$ 0.08 (a)   | 0.360                     | <b>0.002</b>   |
| Evenness ( $E_H$ ) | 0.12 $\pm$ 0.01 (a)    | 0.13 $\pm$ 0.01 (a)   | 0.12 $\pm$ 0.01 (a)     | 0.13 $\pm$ 0.01 (a)   | 0.13 $\pm$ 0.01 (a)    | 0.14 $\pm$ 0.01 (a)   | 0.141                     | 0.175          |
| <b>SYM</b>         |                        |                       |                         |                       |                        |                       |                           |                |
| OTU Richness       | 24.90 $\pm$ 1.70 (b)   | 44.22 $\pm$ 2.11 (c)  | 22.54 $\pm$ 1.54 (b)    | 46.30 $\pm$ 2.35 (c)  | 19.34 $\pm$ 0.87 (a)   | 24.92 $\pm$ 1.90 (b)  | < <b>0.001</b>            | < <b>0.001</b> |
| Chao1              | 39.30 $\pm$ 3.52 (b)   | 61.13 $\pm$ 3.05 (c)  | 34.25 $\pm$ 2.78 (ab)   | 63.95 $\pm$ 3.34 (c)  | 24.72 $\pm$ 1.24 (a)   | 32.04 $\pm$ 2.50 (ab) | < <b>0.001</b>            | < <b>0.001</b> |
| Shannon ( $H'$ )   | 1.64 $\pm$ 0.08 (ab)   | 2.17 $\pm$ 0.08 (c)   | 1.45 $\pm$ 0.10 (a)     | 1.53 $\pm$ 0.07 (bc)  | 1.92 $\pm$ 0.09 (a)    | 1.57 $\pm$ 0.08 (a)   | 0.280                     | < <b>0.001</b> |
| Evenness ( $E_H$ ) | 0.26 $\pm$ 0.02 (b)    | 0.24 $\pm$ 0.02 (b)   | 0.25 $\pm$ 0.02 (b)     | 0.17 $\pm$ 0.01 (a)   | 0.27 $\pm$ 0.01 (b)    | 0.24 $\pm$ 0.01 (ab)  | 0.751                     | < <b>0.001</b> |
| <b>SAP</b>         |                        |                       |                         |                       |                        |                       |                           |                |
| OTU Richness       | 47.80 $\pm$ 2.36 (d)   | 29.96 $\pm$ 1.45 (b)  | 40.68 $\pm$ 2.12 (c)    | 32.06 $\pm$ 1.41 (b)  | 42.42 $\pm$ 1.55 (c)   | 24.12 $\pm$ 1.38 (a)  | < <b>0.001</b>            | < <b>0.001</b> |
| Chao1              | 70.40 $\pm$ 4.08 (b)   | 46.85 $\pm$ 2.67 (a)  | 65.21 $\pm$ 3.89 (b)    | 47.92 $\pm$ 2.30 (a)  | 64.96 $\pm$ 2.89 (b)   | 38.38 $\pm$ 2.70 (a)  | 0.495                     | <b>0.017</b>   |
| Shannon ( $H'$ )   | 2.30 $\pm$ 0.10 (a)    | 1.95 $\pm$ 0.08 (a)   | 2.15 $\pm$ 0.12 (a)     | 2.20 $\pm$ 0.10 (a)   | 2.28 $\pm$ 0.10 (a)    | 1.95 $\pm$ 0.08 (a)   | 0.596                     | <b>0.070</b>   |
| Evenness ( $E_H$ ) | 0.26 $\pm$ 0.02 (a)    | 0.28 $\pm$ 0.02 (a)   | 0.31 $\pm$ 0.03 (a)     | 0.36 $\pm$ 0.03 (a)   | 0.29 $\pm$ 0.02 (a)    | 0.36 $\pm$ 0.03 (a)   | 0.521                     | <b>0.019</b>   |
| <b>PAT</b>         |                        |                       |                         |                       |                        |                       |                           |                |
| OTU Richness       | 10.20 $\pm$ 0.64 (d)   | 4.56 $\pm$ 0.32 (b)   | 7.92 $\pm$ 0.51 (c)     | 5.30 $\pm$ 0.32 (b)   | 8.24 $\pm$ 0.59 (c)    | 3.18 $\pm$ 0.27 (a)   | < <b>0.001</b>            | < <b>0.001</b> |
| Chao1              | 14.71 $\pm$ 1.01 (c)   | 6.50 $\pm$ 0.60 (a)   | 13.33 $\pm$ 1.09 (bc)   | 7.37 $\pm$ 0.65 (a)   | 11.30 $\pm$ 0.89 (b)   | 4.52 $\pm$ 0.52 (a)   | <b>0.056</b>              | <b>0.003</b>   |
| Shannon ( $H'$ )   | 1.56 $\pm$ 0.07 (d)    | 1.05 $\pm$ 0.07 (b)   | 1.45 $\pm$ 0.08 (cd)    | 1.21 $\pm$ 0.07 (bc)  | 1.61 $\pm$ 0.08 (d)    | 0.74 $\pm$ 0.08 (a)   | 0.334                     | < <b>0.001</b> |
| Evenness ( $E_H$ ) | 0.58 $\pm$ 0.03 (a)    | 0.76 $\pm$ 0.04 (b)   | 0.67 $\pm$ 0.04 (ab)    | 0.72 $\pm$ 0.03 (b)   | 0.72 $\pm$ 0.03 (b)    | 0.80 $\pm$ 0.04 (b)   | <b>0.006</b>              | 0.263          |

**Table S3:** Beta diversity of root-associated fungal assemblages of all (OTUs), symbiotrophic (SYM), and saprotrophic (SAP) fungi between organic layer and mineral soil. Linear models were used to determine the extent of the fungal turnover ( $\beta_{\text{SIM}}$ ), nestedness ( $\beta_{\text{SNE}}$ ) and total beta-diversity ( $\beta_{\text{SOR}}$ ) among the regions. Data indicate (n = 50). Significant differences of the means are shown in bold.

| <b>Fungal groups</b> | <b>Diversity groups</b> | <b>Sum sq</b> | <b>DF</b> | <b>F-value</b> | <b>p-value (regions)</b> |
|----------------------|-------------------------|---------------|-----------|----------------|--------------------------|
| <b>All fungi</b>     | Turnover                | 0.755         | 2         | 33.221         | < <b>0.001</b>           |
|                      | Nestedness              | 0.117         | 2         | 13.373         | < <b>0.001</b>           |
|                      | Beta-diversity          | 0.279         | 2         | 20.482         | < <b>0.001</b>           |
| <b>SYM</b>           | Turnover                | 0.764         | 2         | 13.989         | < <b>0.001</b>           |
|                      | Nestedness              | 0.159         | 2         | 6.557          | <b>0.002</b>             |
|                      | Beta-diversity          | 1.608         | 2         | 41.20          | < <b>0.001</b>           |
| <b>SAP</b>           | Turnover                | 0.509         | 2         | 14.122         | < <b>0.001</b>           |
|                      | Nestedness              | 0.175         | 2         | 9.977          | < <b>0.001</b>           |
|                      | Beta-diversity          | 0.101         | 2         | 5.636          | <b>0.004</b>             |

**Table S4:** Relative abundance, number of sequences and number of taxa (OTU-based) of the root-associated fungal orders present in the organic layer and mineral soil in the Biodiversity Exploratory forest plots.

| Fungal order          | Taxa | Sequences | Relative abundance |
|-----------------------|------|-----------|--------------------|
| Agaricales            | 300  | 251005    | 21.57              |
| Russulales            | 294  | 219690    | 18.88              |
| Helotiales            | 300  | 206307    | 17.73              |
| Thelephorales         | 283  | 57089     | 4.91               |
| Sebacinales           | 224  | 39445     | 3.39               |
| Mytilinidales         | 243  | 29840     | 2.56               |
| Boletales             | 257  | 28914     | 2.48               |
| Pleosporales          | 287  | 25927     | 2.23               |
| Pezizales             | 268  | 22713     | 1.95               |
| Trechisporales        | 241  | 17202     | 1.48               |
| Atheliales            | 191  | 16855     | 1.45               |
| Hypocreales           | 300  | 16702     | 1.44               |
| Cantharellales        | 232  | 14290     | 1.23               |
| Tubeufiales           | 172  | 8461      | 0.73               |
| Chaetothyriales       | 290  | 8412      | 0.72               |
| Xylariales            | 197  | 7327      | 0.63               |
| Cystofilobasidiales   | 45   | 7050      | 0.61               |
| Polyporales           | 135  | 6308      | 0.54               |
| Sordariales           | 265  | 5847      | 0.50               |
| unidentified          | 300  | 116894    | 10.04              |
| Others                | 228  | 6202      | 0.53               |
| Mortierellales        | 292  | 5187      | 0.45               |
| Hymenochaetales       | 126  | 5009      | 0.43               |
| Auriculariales        | 138  | 4330      | 0.37               |
| Capnodiales           | 263  | 4208      | 0.36               |
| Glomerales            | 138  | 4121      | 0.35               |
| Chaetosphaeriales     | 219  | 3359      | 0.29               |
| Archaeorhizomycetales | 86   | 3153      | 0.27               |
| Diaporthales          | 93   | 2763      | 0.24               |
| Rhytismatales         | 110  | 2716      | 0.23               |
| Thelebolales          | 158  | 2097      | 0.18               |
| Eurotiales            | 224  | 1829      | 0.16               |
| Venturiales           | 149  | 1696      | 0.15               |
| Tremellales           | 244  | 1555      | 0.13               |
| Trichosporonales      | 193  | 1353      | 0.12               |
| Hysterangiales        | 12   | 1050      | 0.09               |
| Minutisphaerales      | 26   | 723       | 0.06               |
| Glomerellales         | 156  | 593       | 0.05               |
| Sporidiobolales       | 90   | 531       | 0.05               |
| Geoglossales          | 23   | 511       | 0.04               |
| Gomphales             | 11   | 475       | 0.04               |



**Table S4 (continued)**

| <b>Fungal order</b>    | <b>Taxa</b> | <b>Sequences</b> | <b>Relative abundance</b> |
|------------------------|-------------|------------------|---------------------------|
| Leucosporidiales       | 75          | 352              | 0.03                      |
| Phallales              | 27          | 350              | 0.03                      |
| Onygenales             | 53          | 291              | 0.03                      |
| Filobasidiales         | 59          | 289              | 0.02                      |
| Orbiliales             | 107         | 272              | 0.02                      |
| Ostropales             | 45          | 260              | 0.02                      |
| Dothideales            | 92          | 256              | 0.02                      |
| Mucorales              | 69          | 232              | 0.02                      |
| Botryosphaeriales      | 60          | 195              | 0.02                      |
| Holtermanniales        | 32          | 193              | 0.02                      |
| Myrmecridiales         | 41          | 181              | 0.02                      |
| Lecanorales            | 65          | 160              | 0.01                      |
| Saccharomycetales      | 45          | 149              | 0.01                      |
| Coniochaetales         | 62          | 148              | 0.01                      |
| Microascales           | 50          | 134              | 0.01                      |
| Acarosporales          | 5           | 109              | 0.01                      |
| Tremellodendropsidales | 28          | 108              | 0.01                      |
| Verrucariales          | 1           | 76               | 0.01                      |
| Phacidiales            | 28          | 48               | 0.00                      |
| Diversisporales        | 14          | 46               | 0.00                      |
| Zoopagales             | 32          | 42               | 0.00                      |
| Olpidiales             | 9           | 36               | 0.00                      |
| Atractiellales         | 13          | 35               | 0.00                      |
| Archaeosporales        | 14          | 23               | 0.00                      |
| Umbelopsidales         | 15          | 18               | 0.00                      |
| Magnaporthales         | 2           | 16               | 0.00                      |
| Kriegeriales           | 10          | 15               | 0.00                      |
| Taphrinales            | 14          | 15               | 0.00                      |
| Exobasidiales          | 8           | 11               | 0.00                      |
| Calosphaeriales        | 1           | 10               | 0.00                      |
| Spizellomycetales      | 8           | 10               | 0.00                      |
| Myriangiales           | 6           | 9                | 0.00                      |
| Caliciales             | 2           | 8                | 0.00                      |
| Cystobasidiales        | 4           | 6                | 0.00                      |
| Urocystidales          | 4           | 6                | 0.00                      |
| Annulatascales         | 3           | 5                | 0.00                      |
| Boliniales             | 1           | 5                | 0.00                      |
| Dacrymycetales         | 4           | 5                | 0.00                      |
| Teloschistales         | 1           | 5                | 0.00                      |
| Malasseziales          | 3           | 3                | 0.00                      |
| Patellariales          | 1           | 3                | 0.00                      |
| Agaricostilbales       | 1           | 2                | 0.00                      |
| Entorrhizales          | 1           | 1                | 0.00                      |
| Ophiostomatales        | 1           | 1                | 0.00                      |
| Phaeomoniellales       | 1           | 1                | 0.00                      |

**Table S5:** Classification of the top nineteen root-associated fungal orders according to functional groups. An order was classified as SYM (symbiotrophic, pink) or as SAP (saprotrophic, grey) when > 95% of the sequences of that order were classified as SYM or SAP, respectively. PAT = pathotrophic. The data set encompasses > 85% of all sequences.

| Fungal order        | Classification | Trophic mode | Taxa | Sequences | Relative abundance |
|---------------------|----------------|--------------|------|-----------|--------------------|
| Agaricales          | SYM+SAP        | PAT          | 9    | 18        | 0.01               |
| Agaricales          |                | SAP          | 780  | 121047    | 44.31              |
| Agaricales          |                | SYM          | 840  | 152130    | 55.69              |
| Russulales          | SYM            | SAP          | 81   | 705       | 0.11               |
| Russulales          |                | SYM          | 867  | 657039    | 99.89              |
| Helotiales          | SYM+SAP        | PAT          | 498  | 10107     | 4.80               |
| Helotiales          |                | SAP          | 900  | 136800    | 64.99              |
| Helotiales          |                | SYM          | 606  | 63576     | 30.20              |
| Thelephorales       | SYM            | SAP          | 15   | 144       | 0.28               |
| Thelephorales       |                | SYM          | 768  | 51342     | 99.72              |
| Sebacinales         |                | SYM          | 663  | 117075    | 100.00             |
| Mytilinidiales      | SYM            | SYM          | 711  | 89424     | 99.93              |
| Mytilinidiales      |                | SAP          | 45   | 66        | 0.07               |
| Boletales           |                | SAP          | 45   | 618       | 1.05               |
| Boletales           | SYM            | SYM          | 720  | 57990     | 98.95              |
| Pleosporales        |                | PAT          | 360  | 11271     | 35.74              |
| Pleosporales        |                | SAP          | 702  | 20241     | 64.18              |
| Pleosporales        | SAP+PAT        | SYM          | 24   | 24        | 0.08               |
| Pezizales           |                | SAP          | 117  | 1479      | 2.52               |
| Pezizales           |                | SYM          | 720  | 57261     | 97.48              |
| Trechisporales      | SAP            | SAP          | 516  | 38856     | 100.00             |
| Atheliales          | SYM            | SAP          | 135  | 2127      | 4.25               |
| Atheliales          |                | SYM          | 528  | 47898     | 95.75              |
| Hypocreales         | SAP+PAT        | PAT          | 846  | 10035     | 23.92              |
| Hypocreales         |                | SAP          | 894  | 31911     | 76.08              |
| Cantharellales      | SYM            | PAT          | 9    | 36        | 0.11               |
| Cantharellales      |                | SAP          | 129  | 300       | 0.92               |
| Cantharellales      |                | SYM          | 297  | 32151     | 98.97              |
| Tubeufiales         | SAP            | SAP          | 510  | 24876     | 100.00             |
| Chaetothyriales     |                | SAP          | 837  | 11373     | 97.16              |
| Chaetothyriales     | SAP            | SYM          | 114  | 333       | 2.84               |
| Xylariales          | SAP+PAT        | PAT          | 360  | 5382      | 90.02              |
| Xylariales          |                | SAP          | 255  | 597       | 9.98               |
| Cystofilobasidiales | SAP            | PAT          | 21   | 36        | 0.17               |
| Cystofilobasidiales |                | SAP          | 117  | 21057     | 99.83              |
| Polyporales         | SAP            | SAP          | 177  | 18108     | 100.00             |
| Sordariales         | SAP            | SAP          | 750  | 14013     | 100.00             |

**Table S6:** Root-associated symbiotrophic and saprotrophic indicator taxa in the organic layer and mineral soil in three biogeographic regions. ALB = Schwäbische Alb, HAI = Hainich-Dün and SCH = Schorfheide-Chorin. Only significant fungal species belonging to the symbiotrophic (SYM) and saprotrophic (SAP) groups are shown in the table. Root-associated fungal indicator taxa with multiple or unknown trophic modes are not shown in the table. Indicator taxa for the organic layer are coloured in pink and for the mineral soil in blue.

| Region | ASV ID     | Orders         | Genus         | Species                           | Trophic mode | Habitat preference | Stat | p-value |
|--------|------------|----------------|---------------|-----------------------------------|--------------|--------------------|------|---------|
| ALB    | ASV_000007 | Russulales     | Lactarius     | <i>Lactarius_rubrocinctus</i>     | SYM          | Mineral            | 0.70 | 0.02    |
| HAI    | ASV_000013 | Russulales     | unidentified  | <i>Russulaceae_sp.</i>            | SYM          | Mineral            | 0.77 | 0.03    |
| HAI    | ASV_000031 | Sebacinales    | Sebacina      | <i>Sebacina_sp</i>                | SYM          | Mineral            | 0.57 | 0.02    |
| SCH    | ASV_000035 | Mytilinidales  | Cenococcum    | <i>Cenococcum_sp</i>              | SYM          | Mineral            | 0.69 | 0.02    |
| ALB    | ASV_000040 | Agaricales     | Laccaria      | <i>Laccaria_amethystina</i>       | SYM          | Organic            | 0.63 | 0.04    |
| HAI    | ASV_000040 | Agaricales     | Laccaria      | <i>Laccaria_amethystina</i>       | SYM          | Organic            | 0.71 | 0.04    |
| SCH    | ASV_000040 | Agaricales     | Laccaria      | <i>Laccaria_amethystina</i>       | SYM          | Organic            | 0.69 | 0.03    |
| HAI    | ASV_000044 | Agaricales     | Hygrophorus   | <i>Hygrophorus_eburneus</i>       | SYM          | Mineral            | 0.66 | 0.01    |
| SCH    | ASV_000054 | Russulales     | Russula       | <i>Russula_ionochochloa</i>       | SYM          | Mineral            | 0.71 | 0.01    |
| HAI    | ASV_000056 | Boletales      | Melanogaster  | <i>Melanogaster_sp</i>            | SYM          | Organic            | 0.64 | 0.01    |
| SCH    | ASV_000056 | Boletales      | Melanogaster  | <i>Melanogaster_sp</i>            | SYM          | Organic            | 0.67 | 0.01    |
| ALB    | ASV_000062 | Agaricales     | Hygrophorus   | <i>Hygrophorus_unicolor</i>       | SYM          | Mineral            | 0.60 | 0.01    |
| HAI    | ASV_000062 | Agaricales     | Hygrophorus   | <i>Hygrophorus_unicolor</i>       | SYM          | Mineral            | 0.63 | 0.01    |
| ALB    | ASV_000086 | Cantharellales | Membranomyces | <i>Membranomyces_sp</i>           | SYM          | Mineral            | 0.47 | 0.04    |
| HAI    | ASV_000089 | Helotiales     | Phialocephala | <i>Phialocephala_sp</i>           | SYM          | Organic            | 0.52 | 0.03    |
| HAI    | ASV_000106 | Atheliales     | Piloderma     | <i>Piloderma_sp</i>               | SYM          | Mineral            | 0.81 | 0.01    |
| ALB    | ASV_000112 | Pezizales      | Tuber         | <i>Tuber_sp</i>                   | SYM          | Mineral            | 0.61 | 0.01    |
| HAI    | ASV_000112 | Pezizales      | Tuber         | <i>Tuber_sp</i>                   | SYM          | Mineral            | 0.48 | 0.02    |
| ALB    | ASV_000131 | Russulales     | unidentified  | <i>Russulaceae_sp</i>             | SYM          | Mineral            | 0.68 | 0.01    |
| HAI    | ASV_000131 | Russulales     | unidentified  | <i>Russulaceae_sp</i>             | SYM          | Mineral            | 0.80 | 0.01    |
| SCH    | ASV_000131 | Russulales     | unidentified  | <i>Russulaceae_sp</i>             | SYM          | Mineral            | 0.50 | 0.02    |
| SCH    | ASV_000133 | Helotiales     | Acephala      | <i>Acephala_macrosclerotiorum</i> | SYM          | Organic            | 0.55 | 0.04    |
| ALB    | ASV_000149 | Russulales     | Lactarius     | <i>Lactarius_pallidus</i>         | SYM          | Mineral            | 0.50 | 0.02    |

Table S6 (continued)

| Region | ASV ID     | Orders         | Genus        | Species                         | Trophic mode | Habitat preference | Stat | p-value |
|--------|------------|----------------|--------------|---------------------------------|--------------|--------------------|------|---------|
| HAI    | ASV_000149 | Russulales     | Lactarius    | <i>Lactarius pallidus</i>       | SYM          | Mineral            | 0.52 | 0.04    |
| ALB    | ASV_000189 | Russulales     | Russula      | <i>Russula_sp</i>               | SYM          | Mineral            | 0.51 | 0.01    |
| ALB    | ASV_000237 | Sebacinales    | Sebacina     | <i>Sebacina_sp</i>              | SYM          | Mineral            | 0.53 | 0.01    |
| HAI    | ASV_000243 | Russulales     | Lactarius    | <i>Lactarius_sp</i>             | SYM          | Mineral            | 0.72 | 0.01    |
| ALB    | ASV_000246 | Agaricales     | Hymenogaster | <i>Hymenogaster_sp</i>          | SYM          | Mineral            | 0.53 | 0.01    |
| ALB    | ASV_000258 | Agaricales     | Inocybe      | <i>Inocybe fibrosoides</i>      | SYM          | Mineral            | 0.62 | 0.01    |
| SCH    | ASV_000261 | Thelephorales  | Tomentella   | <i>Tomentella_sp</i>            | SYM          | Mineral            | 0.37 | 0.02    |
| HAI    | ASV_000271 | Agaricales     | Amanita      | <i>Amanita_sp</i>               | SYM          | Mineral            | 0.40 | 0.04    |
| SCH    | ASV_000271 | Agaricales     | Amanita      | <i>Amanita_sp</i>               | SYM          | Mineral            | 0.54 | 0.01    |
| ALB    | ASV_000272 | Agaricales     | Hygrophorus  | <i>Hygrophorus discoxanthus</i> | SYM          | Mineral            | 0.67 | 0.01    |
| ALB    | ASV_000306 | Russulales     | Russula      | <i>Russula foetens</i>          | SYM          | Mineral            | 0.53 | 0.01    |
| HAI    | ASV_000306 | Russulales     | Russula      | <i>Russula foetens</i>          | SYM          | Mineral            | 0.35 | 0.03    |
| ALB    | ASV_000308 | Pezizales      | Otidea       | <i>Otidea alutacea</i>          | SYM          | Mineral            | 0.54 | 0.04    |
| HAI    | ASV_000314 | Cantharellales | Clavulina    | <i>Clavulina_sp</i>             | SYM          | Mineral            | 0.57 | 0.04    |
| HAI    | ASV_000318 | Mytilinidales  | Cenococcum   | <i>Cenococcum geophilum</i>     | SYM          | Mineral            | 0.64 | 0.01    |
| SCH    | ASV_000341 | Russulales     | Lactarius    | <i>Lactarius vellereus</i>      | SYM          | Mineral            | 0.46 | 0.03    |
| HAI    | ASV_000352 | Sebacinales    | Sebacina     | <i>Sebacina_sp</i>              | SYM          | Mineral            | 0.67 | 0.01    |
| HAI    | ASV_000362 | Thelephorales  | Thelephora   | <i>Thelephora_sp</i>            | SYM          | Mineral            | 0.60 | 0.01    |
| HAI    | ASV_000369 | Agaricales     | Hymenogaster | <i>Hymenogaster_sp</i>          | SYM          | Mineral            | 0.51 | 0.01    |
| HAI    | ASV_000398 | Russulales     | Russula      | <i>Russula_sp</i>               | SYM          | Mineral            | 0.37 | 0.01    |
| SCH    | ASV_000398 | Russulales     | Russula      | <i>Russula_sp</i>               | SYM          | Mineral            | 0.64 | 0.01    |
| ALB    | ASV_000405 | Sebacinales    | Sebacina     | <i>Sebacina_sp</i>              | SYM          | Mineral            | 0.56 | 0.01    |
| HAI    | ASV_000458 | Agaricales     | Hygrophorus  | <i>Hygrophorus_sp</i>           | SYM          | Mineral            | 0.45 | 0.01    |
| ALB    | ASV_000486 | Pezizales      | Tarsetta     | <i>Tarsetta_sp</i>              | SYM          | Mineral            | 0.62 | 0.03    |
| ALB    | ASV_000559 | Thelephorales  | Tomentella   | <i>Tomentella sublilacina</i>   | SYM          | Organic            | 0.40 | 0.01    |
| SCH    | ASV_000559 | Thelephorales  | Tomentella   | <i>Tomentella sublilacina</i>   | SYM          | Organic            | 0.66 | 0.01    |
| ALB    | ASV_000675 | Russulales     | Russula      | <i>Russula acrifolia</i>        | SYM          | Mineral            | 0.58 | 0.01    |

Table S6 (continued)

| Region | ASV ID     | Orders              | Genus        | Species                         | Trophic mode | Habitat preference | Stat | p-value |
|--------|------------|---------------------|--------------|---------------------------------|--------------|--------------------|------|---------|
| ALB    | ASV_000741 | Agaricales          | Hymenogaster | <i>Hymenogaster_sp</i>          | SYM          | Mineral            | 0.60 | 0.03    |
| HAI    | ASV_000811 | Agaricales          | Inocybe      | <i>Inocybe_asterospora</i>      | SYM          | Mineral            | 0.62 | 0.01    |
| ALB    | ASV_000820 | Pezizales           | Tuber        | <i>Tuber_sp</i>                 | SYM          | Mineral            | 0.73 | 0.01    |
| SCH    | ASV_000823 | Pezizales           | Hydnotrya    | <i>Hydnotrya_sp</i>             | SYM          | Mineral            | 0.81 | 0.01    |
| ALB    | ASV_000870 | Thelephorales       | Thelephora   | <i>Thelephora_anthrocephala</i> | SYM          | Mineral            | 0.54 | 0.01    |
| ALB    | ASV_000914 | Glomerales          | unidentified | <i>Glomeraceae_sp</i>           | SYM          | Mineral            | 0.63 | 0.01    |
| HAI    | ASV_000914 | Glomerales          | unidentified | <i>Glomeraceae_sp</i>           | SYM          | Mineral            | 0.64 | 0.01    |
| HAI    | ASV_001095 | Russulales          | Russula      | <i>Russula_olivacea</i>         | SYM          | Mineral            | 0.40 | 0.01    |
| HAI    | ASV_002257 | Sebacinales         | Sebacina     | <i>Sebacina_sp</i>              | SYM          | Mineral            | 0.69 | 0.01    |
| HAI    | ASV_006579 | Russulales          | unidentified | <i>Russulaceae_sp</i>           | SYM          | Mineral            | 0.74 | 0.01    |
| HAI    | ASV_000041 | Agaricales          | Megacollobia | <i>Megacollobia_platyphylla</i> | SAP          | Organic            | 0.61 | 0.01    |
| SCH    | ASV_000041 | Agaricales          | Megacollobia | <i>Megacollobia_platyphylla</i> | SAP          | Organic            | 0.51 | 0.01    |
| HAI    | ASV_000067 | Cystofilobasidiales | Mrakia       | <i>Mrakia_aquatica</i>          | SAP          | Organic            | 0.66 | 0.01    |
| ALB    | ASV_000097 | Helotiales          | Lachnum      | <i>Lachnum_sp</i>               | SAP          | Mineral            | 0.51 | 0.01    |
| SCH    | ASV_000097 | Helotiales          | Lachnum      | <i>Lachnum_sp</i>               | SAP          | Mineral            | 0.55 | 0.04    |
| ALB    | ASV_000109 | Agaricales          | Hydropus     | <i>Hydropus_moserianus</i>      | SAP          | Mineral            | 0.60 | 0.01    |
| HAI    | ASV_000109 | Agaricales          | Hydropus     | <i>Hydropus_moserianus</i>      | SAP          | Mineral            | 0.35 | 0.03    |
| HAI    | ASV_000110 | Helotiales          | unidentified | <i>Hyaloscyphaceae_sp</i>       | SAP          | Organic            | 0.61 | 0.01    |
| ALB    | ASV_000122 | Tubeufiales         | Titaea       | <i>Titaea_maxilliformis</i>     | SAP          | Organic            | 0.88 | 0.01    |
| HAI    | ASV_000122 | Tubeufiales         | Titaea       | <i>Titaea_maxilliformis</i>     | SAP          | Organic            | 0.85 | 0.01    |
| ALB    | ASV_000162 | Agaricales          | Agrocybe     | <i>Agrocybe_erebia</i>          | SAP          | Mineral            | 0.62 | 0.01    |
| HAI    | ASV_000162 | Agaricales          | Agrocybe     | <i>Agrocybe_erebia</i>          | SAP          | Mineral            | 0.66 | 0.01    |
| HAI    | ASV_000165 | Trechisporales      | Luellia      | <i>Luellia_recondita</i>        | SAP          | Organic            | 0.48 | 0.01    |
| SCH    | ASV_000165 | Trechisporales      | Luellia      | <i>Luellia_recondita</i>        | SAP          | Organic            | 0.73 | 0.04    |
| ALB    | ASV_000174 | Helotiales          | Calycellina  | <i>Calycellina_fagina</i>       | SAP          | Organic            | 0.92 | 0.01    |
| HAI    | ASV_000174 | Helotiales          | Calycellina  | <i>Calycellina_fagina</i>       | SAP          | Organic            | 0.90 | 0.01    |
| SCH    | ASV_000174 | Helotiales          | Calycellina  | <i>Calycellina_fagina</i>       | SAP          | Organic            | 0.88 | 0.01    |

Table S6 (continued)

| Region | ASV ID     | Orders                | Genus             | Species                             | Trophic mode | Habitat preference | Stat | p-value |
|--------|------------|-----------------------|-------------------|-------------------------------------|--------------|--------------------|------|---------|
| ALB    | ASV_000281 | Helotiales            | Encoelia          | <i>Encoelia_sp</i>                  | SAP          | Organic            | 0.65 | 0.01    |
| ALB    | ASV_000303 | Trechisporales        | Trechispora       | <i>Trechispora_sp</i>               | SAP          | Organic            | 0.37 | 0.01    |
| ALB    | ASV_000384 | Sordariales           | Apodus            | <i>Apodus_sp</i>                    | SAP          | Organic            | 0.80 | 0.01    |
| HAI    | ASV_000384 | Sordariales           | Apodus            | <i>Apodus_sp</i>                    | SAP          | Organic            | 0.68 | 0.05    |
| HAI    | ASV_000401 | Pleosporales          | Paraconiothyrium  | <i>Paraconiothyrium_sp</i>          | SAP          | Organic            | 0.51 | 0.01    |
| SCH    | ASV_000416 | Trichosporonales      | Apiotrichum       | <i>Apiotrichum_porosum</i>          | SAP          | Organic            | 0.86 | 0.01    |
| SCH    | ASV_000589 | Hypocreales           | unidentified      | <i>Bionectriaceae_sp</i>            | SAP          | Organic            | 0.80 | 0.02    |
| HAI    | ASV_000599 | Helotiales            | Alatospora        | <i>Alatospora_acuminata</i>         | SAP          | Organic            | 0.79 | 0.01    |
| ALB    | ASV_000615 | Hypocreales           | Ijuhya            | <i>Ijuhya_sp</i>                    | SAP          | Organic            | 0.40 | 0.01    |
| HAI    | ASV_000661 | Helotiales            | Varicosporium     | <i>Varicosporium_elodeae</i>        | SAP          | Mineral            | 0.66 | 0.02    |
| ALB    | ASV_000663 | Hypocreales           | Trichoderma       | <i>Trichoderma_polysporum</i>       | SAP          | Organic            | 0.79 | 0.02    |
| SCH    | ASV_000677 | Helotiales            | unidentified      | <i>Hyaloscyphaceae_sp</i>           | SAP          | Mineral            | 0.69 | 0.02    |
| ALB    | ASV_000772 | Chaetothyriales       | Cladophialophora  | <i>Cladophialophora_sp</i>          | SAP          | Mineral            | 0.86 | 0.01    |
| HAI    | ASV_000774 | Agaricales            | Pseudoclitocybe   | <i>Pseudoclitocybe_cyathiformis</i> | SAP          | Organic            | 0.37 | 0.03    |
| SCH    | ASV_000850 | Sordariales           | Cephalotheca      | <i>Cephalotheca_sp</i>              | SAP          | Organic            | 0.66 | 0.03    |
| HAI    | ASV_000955 | Agaricales            | Lycoperdon        | <i>Lycoperdon_nigrescens</i>        | SAP          | Organic            | 0.52 | 0.02    |
| SCH    | ASV_001094 | Helotiales            | Cryptosporiopsis  | <i>Cryptosporiopsis_sp</i>          | SAP          | Organic            | 0.64 | 0.01    |
| SCH    | ASV_001166 | Helotiales            | unidentified      | <i>Hyaloscyphaceae_sp</i>           | SAP          | Organic            | 0.73 | 0.01    |
| ALB    | ASV_002043 | Chaetothyriales       | Cladophialophora  | <i>Cladophialophora_sp</i>          | SAP          | Organic            | 0.78 | 0.01    |
| HAI    | ASV_002043 | Chaetothyriales       | Cladophialophora  | <i>Cladophialophora_sp</i>          | SAP          | Organic            | 0.79 | 0.01    |
| SCH    | ASV_002658 | Archaeorhizomycetales | Archaeorhizomyces | <i>Archaeorhizomyces_sp</i>         | SAP          | Organic            | 0.57 | 0.02    |
| HAI    | ASV_003876 | Agaricales            | Agrocybe          | <i>Agrocybe_erebia</i>              | SAP          | Mineral            | 0.49 | 0.01    |
| ALB    | ASV_003921 | Pleosporales          | Subplenodomus     | <i>Subplenodomus_galicola</i>       | SAP          | Organic            | 0.58 | 0.01    |
| ALB    | ASV_004119 | Atheliales            | Athelopsis        | <i>Athelopsis_lembospora</i>        | SAP          | Mineral            | 0.66 | 0.01    |
| ALB    | ASV_007068 | Agaricales            | Cyclocybe         | <i>Cyclocybe_sp</i>                 | SAP          | Mineral            | 0.53 | 0.01    |
